# Supplementary material for: Tuning the magnetization dynamics of TbIII-based single-chain magnets through substitution on the nitronyl nitroxide radical
Source: Royal Society of Chemistry journal article supplement (doi:10.1039/c9dt01704f), 2019-01-01
Supplement: c9dt01704f1.pdf [file c9dt01704f1.pdf]

**Electronic Supplementary Information for**  
**Tuning the Magnetization Dynamics of Tb<sup>III</sup>-Based**  
**Single-Chain Magnets Through Substitution on the**  
**Nitronyl Nitroxide Radical**

Xiaoqing Liu, Yu-Xia Wang,\* Zongsu Han, Tian Han, Wei Shi\* and Peng Cheng\*

*Key Laboratory of Advanced Energy Materials Chemistry (MOE), College of Chemistry,  
Nankai University, Tianjin 300071, China.*

\* *To whom correspondence should be addressed. E-mail: shiwei@nankai.edu.cn;*

*pcheng@nankai.edu.cn; wangyuxiank@163.com*

**Table of Contents**

|            |                                                                                                           |     |
|------------|-----------------------------------------------------------------------------------------------------------|-----|
| Section S1 | Plots of Structural Data                                                                                  | S2  |
| Section S2 | Magnetic Characterizations                                                                                | S3  |
| Section S3 | PXRD Patterns                                                                                             | S8  |
| Section S4 | Tables                                                                                                    | S9  |
| Section S5 | Crystal Structures and a.c. Magnetic Property of<br>[Tb(hfac) <sub>3</sub> (NIT-5-ThienPh) <sub>2</sub> ] | S11 |
| Section S6 | References                                                                                                | S11 |

## S1. Plots of Structural Data

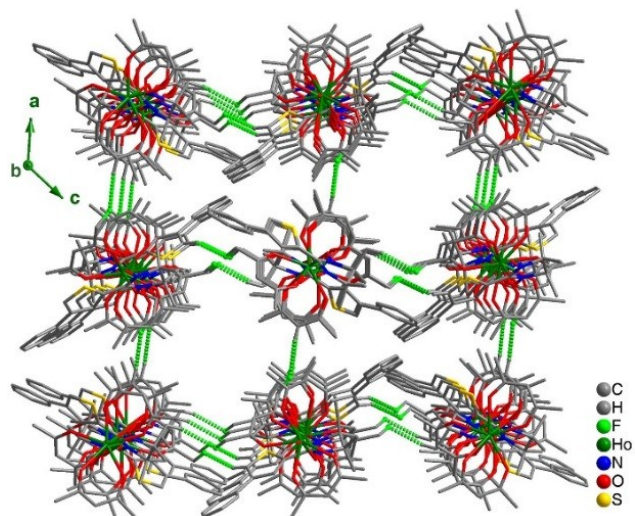

**Fig. S1** Packing diagram of **1** along the crystallographic *a* axis with the interchain C-H...F hydrogen bonds.

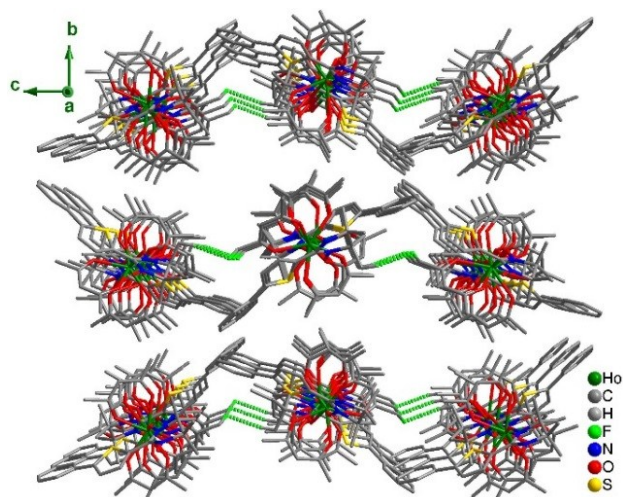

**Fig. S2** Packing diagram of **2** along the crystallographic *b* axis with the interchain C-H...F hydrogen bonds.

## S2. Magnetic Characterizations

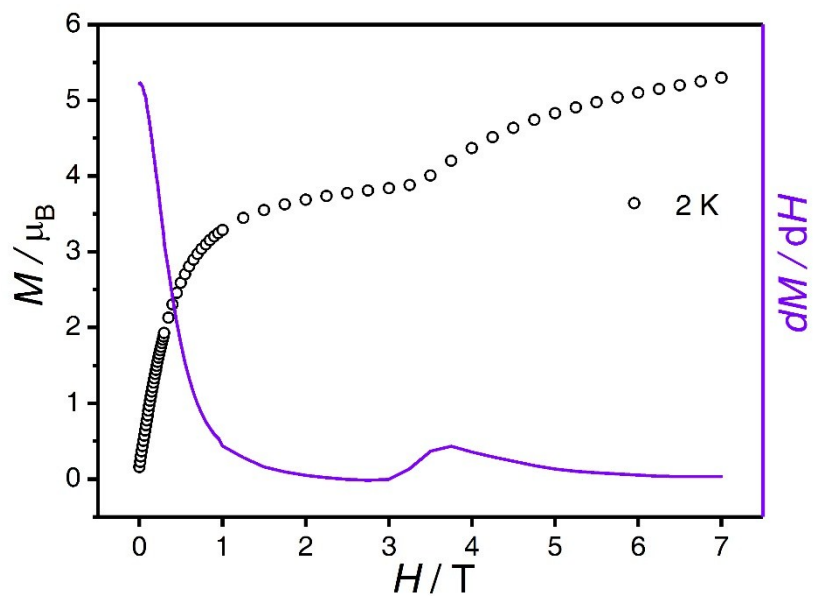

**Fig. S3**  $M$  versus  $H$  (black circles) and  $dM/dH$  versus  $H$  (purple solid line) plots for **1** at 2 K.

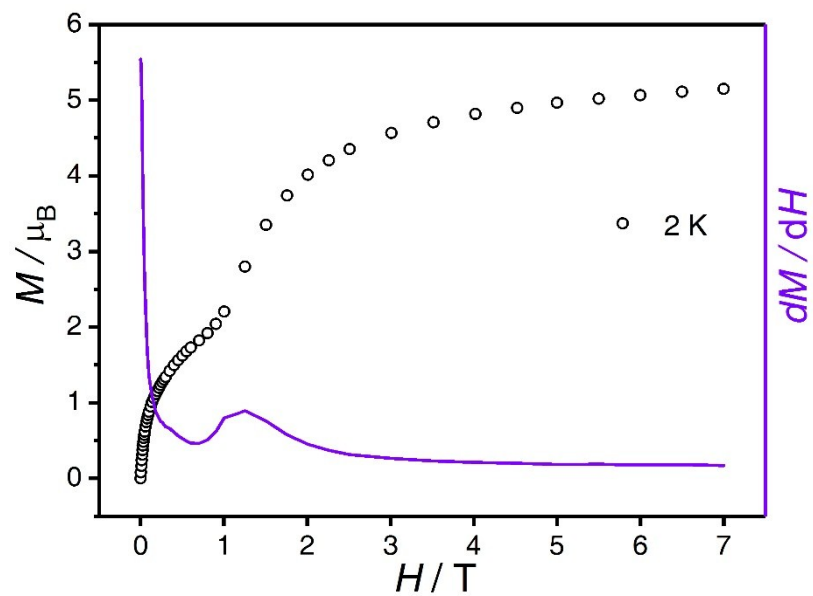

**Fig. S4**  $M$  versus  $H$  (black circles) and  $dM/dH$  versus  $H$  (purple solid line) plots for **2** at 2 K.

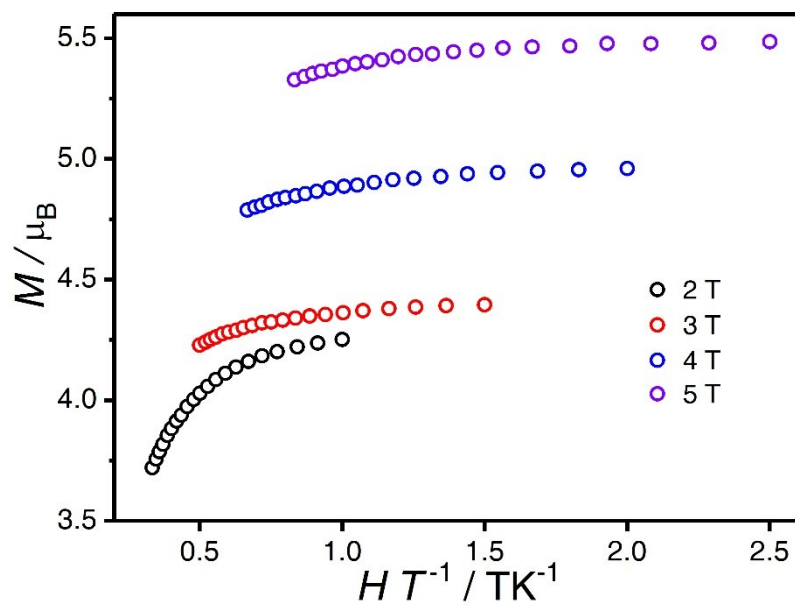

**Fig. S5** Magnetization versus  $HT^{-1}$  plots obtained at 2, 3, 4 and 5 T for **1**.

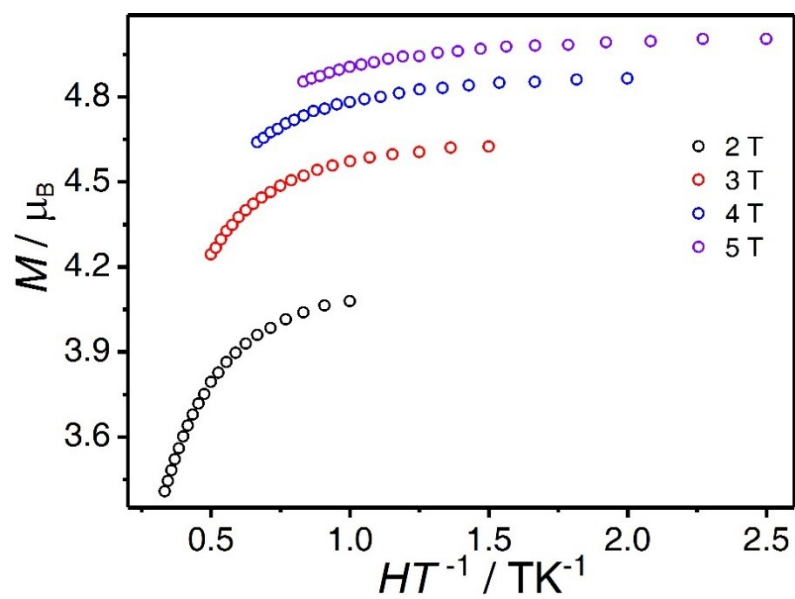

**Fig. S6** Magnetization versus  $HT^{-1}$  plots obtained at 2, 3, 4 and 5 T for **2**.

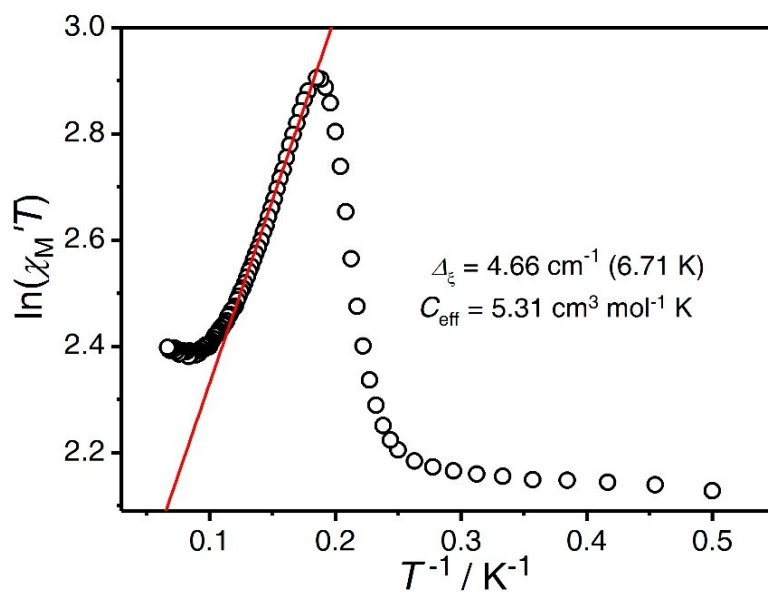

**Fig. S7** Plot of  $\ln(\chi_M' T)$  versus  $T^{-1}$  for **1**. ( $\chi_M'$  is the real component of variable-temperature a.c. susceptibilities at 1 Hz and zero d.c. field). The solid line corresponds to a linear fit.

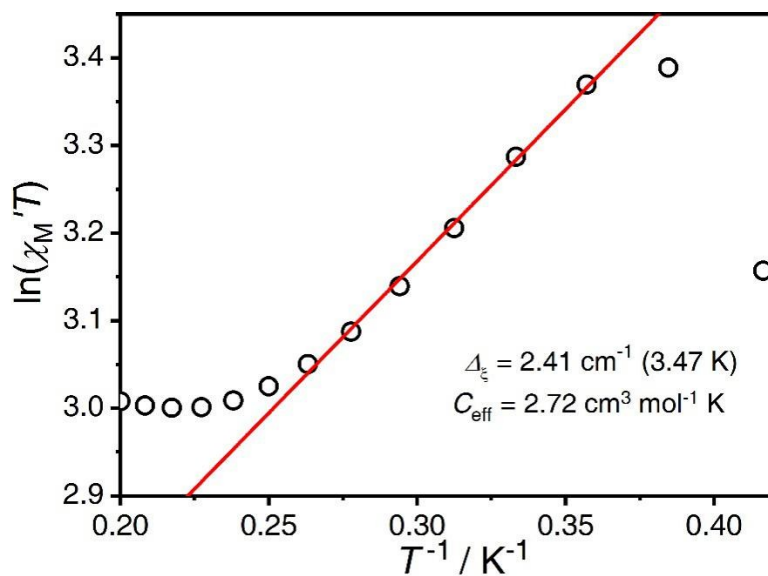

**Fig. S8** Plot of  $\ln(\chi_M' T)$  vs.  $T^{-1}$  for **2**. ( $\chi_M'$  is the real component of variable-temperature a.c. susceptibilities at 1 Hz and zero d.c. field). The solid line corresponds to a linear fit.

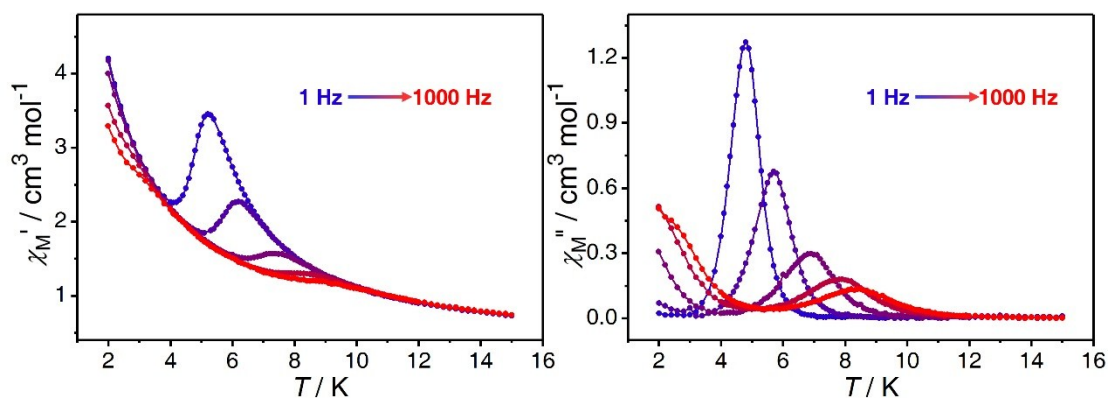

**Fig. S9** Variable-temperature a.c. susceptibilities of **1** in the range of 1–1000 Hz under zero applied d.c. field.

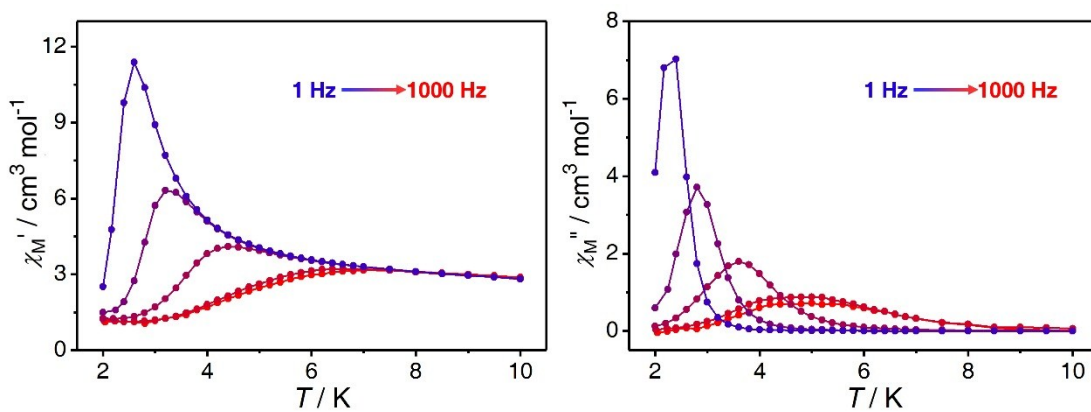

**Fig. S10** Variable-temperature a.c. susceptibilities of **2** in the range of 1–1000 Hz under zero applied d.c. field.

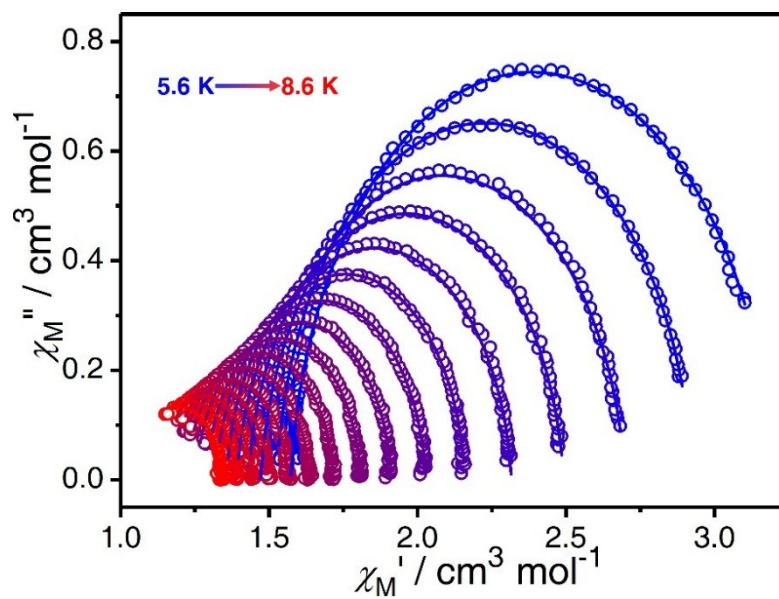

**Fig. S11** Cole-Cole plots at zero d.c. field for 1.

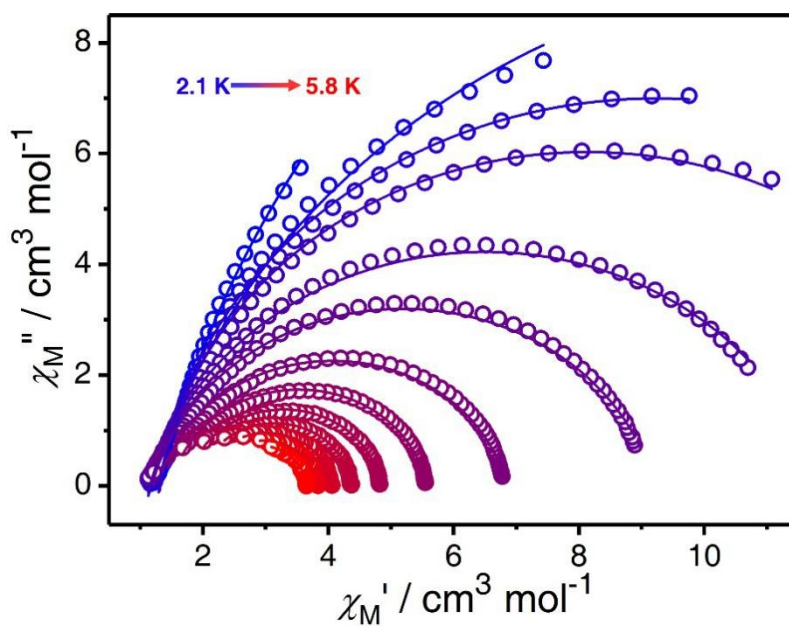

**Fig. S12** Cole-Cole plots at zero d.c. field for 2.

### S3. PXRD Patterns

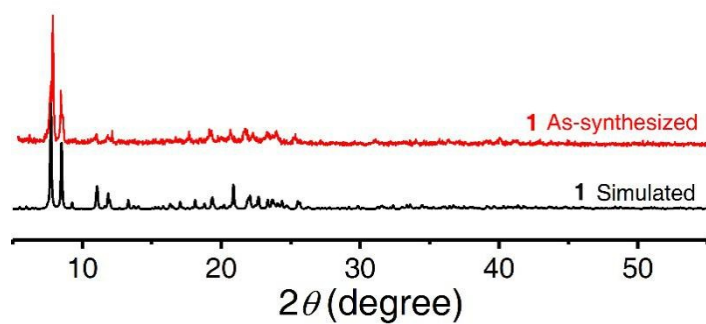

**Fig. S13** PXRD pattern of **1** compared with the simulated pattern from the single crystal data of **1**.

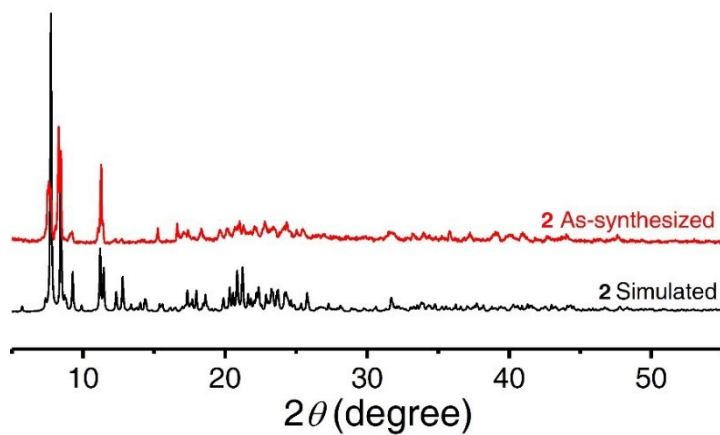

**Fig. S14** PXRD pattern of **2** compared with the simulated pattern from the single crystal data of **2**.



## S4. Tables

**Table S1** Semiquantitative method of polytopal analysis for **1** and **2**<sup>1</sup>

|                       |             | 1-Tb1      |                 | 1-Tb2      |        | DD                 | TP                 | SAP                |
|-----------------------|-------------|------------|-----------------|------------|--------|--------------------|--------------------|--------------------|
|                       |             |            |                 |            |        | (D <sub>2d</sub> ) | (C <sub>2v</sub> ) | (D <sub>4d</sub> ) |
| <i>a</i>              | O2–O4       | 2.8419(70) | O9–O11          | 2.8831(89) | 1.199r | 1.155r             | 1.215r             |                    |
| <i>b</i>              | O2–O7       | 3.5778(91) | O9–O15          | 3.7050(63) | 1.499r | 1.449r             | 1.215r             |                    |
| <i>d</i> <sub>1</sub> | O4[O2 O7]O5 | 29.920(19) | O11[O9 O15]O16  | 23.821(23) | 29.5   | 0.0                | 0.0                |                    |
| <i>d</i> <sub>2</sub> | O3[O1 O6]O8 | 33.687(22) | O12[O10 O13]O14 | 30.387(24) | 29.5   | 21.8               | 0.0                |                    |
| <i>d</i> <sub>3</sub> | O4[O1 O7]O8 | 32.188(24) | O12[O9 O13]O16  | 32.971(18) | 29.5   | 48.2               | 52.4               |                    |
| <i>d</i> <sub>4</sub> | O3[O2 O6]O5 | 26.880(22) | O11[O10 O15]O14 | 27.081(23) | 29.5   | 48.2               | 52.4               |                    |
| <i>f</i> <sub>1</sub> | O3–O4–O6–O7 | 0.584(16)  | O11–O12–O13–O15 | 1.968(16)  | 0      | 14.1               | 24.5               |                    |
| <i>f</i> <sub>2</sub> | O5–O8–O2–O1 | 2.012(17)  | O14–O16–O9–O10  | 1.008(19)  |        |                    |                    |                    |

  

|                       |              | 2-Tb1      |                 | 2-Tb2      |        | DD                 | TP                 | SAP                |
|-----------------------|--------------|------------|-----------------|------------|--------|--------------------|--------------------|--------------------|
|                       |              |            |                 |            |        | (D <sub>2d</sub> ) | (C <sub>2v</sub> ) | (D <sub>4d</sub> ) |
| <i>a</i>              | O1–O3        | 2.8485(44) | O11–O12         | 2.8121(41) | 1.199r | 1.155r             | 1.215r             |                    |
| <i>b</i>              | O1–O5        | 3.4921(44) | O11–O9          | 3.4614(38) | 1.499r | 1.449r             | 1.215r             |                    |
| <i>d</i> <sub>1</sub> | O3[O1 O5]O6  | 31.932(14) | O12[O11 O9]O14  | 31.545(13) | 29.5   | 0.0                | 0.0                |                    |
| <i>d</i> <sub>2</sub> | O4[O2 O16]O7 | 33.989(12) | O13[O15 O8]O10  | 32.183(11) | 29.5   | 21.8               | 0.0                |                    |
| <i>d</i> <sub>3</sub> | O4[O5 O16]O6 | 21.508(11) | O13[O15 O9]O14  | 25.633(11) | 29.5   | 48.2               | 52.4               |                    |
| <i>d</i> <sub>4</sub> | O3[O1 O2]O7  | 31.718(15) | O12[O11 O8]O10  | 26.129(12) | 29.5   | 48.2               | 52.4               |                    |
| <i>f</i> <sub>1</sub> | O3–O4–O1–O16 | 4.162(11)  | O12–O13–O11–O15 | 2.338(85)  | 0      | 14.1               | 24.5               |                    |
| <i>f</i> <sub>2</sub> | O6–O7–O2–O5  | 2.693(10)  | O10–O14–O9–O8   | 2.592(12)  |        |                    |                    |                    |

A[B C]D is the dihedral angle between the ABC plane and the BCD plane. A–B–C–D is the dihedral angle between the (AB)CD and AB(CD) plane, where (AB) signifies the midpoint of the AB edge.

**Table S2** Interchain hydrogen bonds (Å) and the angles (°) for **1** and **2**

| 1                               |                                 |
|---------------------------------|---------------------------------|
| C5⋯F32A / H5⋯F32A / C5–H5–F32A  | 3.320(7) / 2.425(7) / 161.89(2) |
| C46⋯F9 / H46C⋯F9 / C46–H46C–F9  | 3.265(8) / 2.422(7) / 146.65(5) |
| C56⋯F10 / H56⋯F10 / C56–H10–F10 | 3.427(8) / 2.554(1) / 156.79(1) |
| 2                               |                                 |
| C33⋯F2 / H33B⋯F2 / C33–H33B–F2  | 3.280(1) / 2.457(9) / 143.66(4) |

**Table S3** The best results fitted for Cole-Cole plots of **1** by a generalized Debye model

| $T$ (K) | $\chi_S$ (cm <sup>3</sup> mol <sup>-1</sup> ) | $\chi_T$ (cm <sup>3</sup> mol <sup>-1</sup> ) | $\tau$ (s)            | $\alpha$ |
|---------|-----------------------------------------------|-----------------------------------------------|-----------------------|----------|
| 5.6     | 1.57296                                       | 3.20026                                       | $3.04 \times 10^{-2}$ | 0.057    |
| 5.8     | 1.52530                                       | 2.92603                                       | $1.97 \times 10^{-2}$ | 0.046    |
| 6.0     | 1.47147                                       | 2.69931                                       | $1.29 \times 10^{-2}$ | 0.064    |
| 6.2     | 1.43045                                       | 2.49168                                       | $8.76 \times 10^{-3}$ | 0.057    |
| 6.4     | 1.39197                                       | 2.31651                                       | $5.90 \times 10^{-3}$ | 0.056    |
| 6.6     | 1.35764                                       | 2.15914                                       | $4.23 \times 10^{-3}$ | 0.042    |
| 6.8     | 1.3224                                        | 2.02747                                       | $2.91 \times 10^{-3}$ | 0.048    |
| 7.0     | 1.29007                                       | 1.91185                                       | $2.12 \times 10^{-3}$ | 0.049    |
| 7.2     | 1.25576                                       | 1.80821                                       | $1.55 \times 10^{-3}$ | 0.042    |
| 7.4     | 1.22401                                       | 1.71594                                       | $1.13 \times 10^{-3}$ | 0.040    |
| 7.6     | 1.1958                                        | 1.63623                                       | $8.51 \times 10^{-4}$ | 0.045    |
| 7.8     | 1.16977                                       | 1.56410                                       | $6.47 \times 10^{-4}$ | 0.047    |
| 8.0     | 1.14109                                       | 1.49704                                       | $5.11 \times 10^{-4}$ | 0.030    |
| 8.2     | 1.12329                                       | 1.43985                                       | $3.97 \times 10^{-4}$ | 0.019    |
| 8.4     | 1.09590                                       | 1.38663                                       | $3.10 \times 10^{-4}$ | 0.011    |
| 8.6     | 1.06363                                       | 1.33736                                       | $2.57 \times 10^{-4}$ | 0.018    |

**Table S4** The best results fitted for Cole-Cole plots of **2** by a generalized Debye model

| $T$ (K) | $\chi_S$ (cm <sup>3</sup> mol <sup>-1</sup> ) | $\chi_T$ (cm <sup>3</sup> mol <sup>-1</sup> ) | $\tau$ (s)            | $\alpha$ |
|---------|-----------------------------------------------|-----------------------------------------------|-----------------------|----------|
| 2.5     | 1.32196                                       | 14.94627                                      | $8.92 \times 10^{-2}$ | 0.078    |
| 2.75    | 1.15341                                       | 11.85144                                      | $3.08 \times 10^{-2}$ | 0.149    |
| 3.0     | 1.18549                                       | 9.20818                                       | $1.28 \times 10^{-2}$ | 0.143    |
| 3.4     | 1.29182                                       | 6.84737                                       | $4.27 \times 10^{-3}$ | 0.131    |
| 3.8     | 1.50227                                       | 5.56876                                       | $1.69 \times 10^{-3}$ | 0.099    |
| 4.2     | 1.75601                                       | 4.82711                                       | $7.78 \times 10^{-4}$ | 0.068    |
| 4.6     | 1.94537                                       | 4.35962                                       | $4.23 \times 10^{-4}$ | 0.042    |
| 5.0     | 1.99649                                       | 4.04789                                       | $2.01 \times 10^{-4}$ | 0.045    |

## S5. Crystal Structures and a.c. Magnetic Property of [Tb(hfac)<sub>3</sub>(NIT-5-ThienPh)<sub>2</sub>]

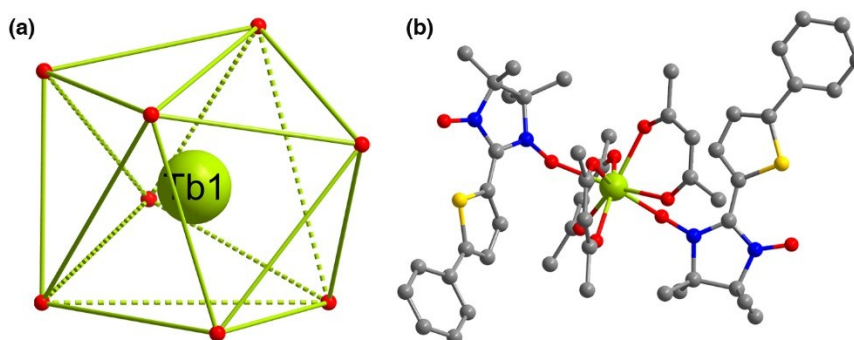

**Fig. S15** (a) Coordination polyhedron of the Tb<sup>III</sup> ion in [Tb(hfac)<sub>3</sub>(NIT-5-ThienPh)<sub>2</sub>]. (b) Molecular structure of [Tb(hfac)<sub>3</sub>(NIT-5-ThienPh)<sub>2</sub>].

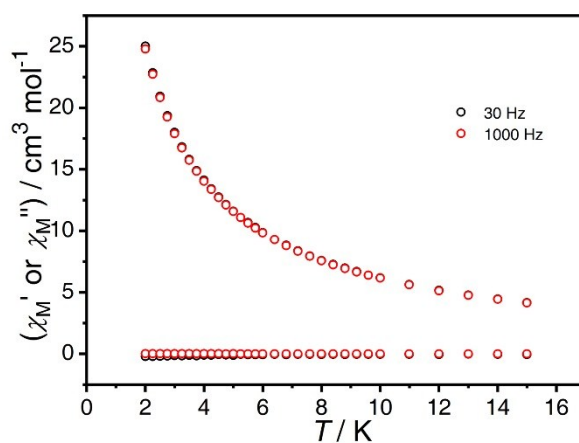

**Fig. S16** Variable-temperature a.c. susceptibilities of [Tb(hfac)<sub>3</sub>(NIT-5-ThienPh)<sub>2</sub>] under zero applied d.c. field.

## S6. References

- (1) (a) L. Muetterties and L. J. Guggenberger, *J. Am. Chem. Soc.*, 1974, **96**, 1748–1756; (b) M. G. B. Drew, *Coord. Chem. Rev.*, 1977, **24**, 179–275.
